# Supplementary material for: AntiDMPpred: a web service for identifying anti-diabetic peptides
Source: PeerJ. 2022 Jun 14;10:e13581. doi: 10.7717/peerj.13581 (PMC9205309; doi:10.7717/peerj.13581)
Supplement: Supplemental Information 1 — Parameters to be optimized in the machine learning methods and feature selection. [file peerj-10-13581-s001.docx]

**Supplementary Information for**

**AntiDMPpred: a web service for identifying anti-diabetic peptides**

Xue Chen1, Jian Huang2, Bifang He1

1Medical College, Guizhou University, Guiyang 550025, Guizhou, China

2School of Life Science and Technology, University of Electronic Science and Technology of China, Chengdu 6173001, Sichuan, China

Corresponding Author:

Bifang He

Huaxi District, Guiyang, Guizhou, 550025, China

Email address: bfhe@gzu.edu.cn

Jian Huang

No.2006, Xiyuan Ave, West Hi-Tech Zone, Chengdu 6173001, Sichuan, China

Email address: hj@uestc.edu.cn

Supplementary Table 1 Parameters to be optimized in machine learning methods

| **Machine learning method** | **Parameter to be optimized** |
| --- | --- |
| Random Forest (RF) | Number of trees |
| K-Nearest Neighbor (KNN) | k |
| LinearSVM | c |
| RBFSVM | c, g |

Supplementary Table 2 Parameters to be optimized in the feature selection

| **Feature selection method** | **Parameter to be optimized** |
| --- | --- |
| F-score (Fscore) | Feature number |
| K-means (Kmeans) | Cluster number |
| Lasso | alpha, Feature number |
| Pearson correlation (Pearson) | Feature number |
| Spearman correlation (Spearman) | Feature number |
| Student's *t*-test (Ttest) | Feature number |

Supplementary Table 3 Performance comparison of data augmentation with original dataset

| **Feature scoring method** | **Machine learning method** | **Dataset** | **Accuracy (%)** | **Sensitivity (%)** | **Specificity (%)** | **Precision (%)** | **MCC** | **F1** | **AUCROC** |
| --- | --- | --- | --- | --- | --- | --- | --- | --- | --- |
| Pearson | RF | original | 77.12 | 80.51 | 73.73 | 75.40 | 0.5436 | 0.7787 | 0.8193 |
| 100% | 75.00 | 77.97 | 72.03 | 73.60 | 0.5009 | 0.7572 | 0.8138 |
| 200% | 73.52 | 77.12 | 69.92 | 71.94 | 0.4716 | 0.7444 | 0.8109 |
| 300% | 75.85 | 77.97 | 73.73 | 77.33 | 0.5218 | 0.7549 | 0.8314 |
| KNN | original | 72.46 | 76.69 | 68.22 | 70.70 | 0.4508 | 0.7358 | / |
| 100% | 70.13 | 72.03 | 68.22 | 69.39 | 0.4028 | 0.7069 | / |
| 200% | 72.03 | 73.73 | 70.34 | 71.31 | 0.4409 | 0.7250 | / |
| 300% | 72.46 | 74.15 | 70.76 | 73.57 | 0.4537 | 0.7212 | / |
| LinearSVM | original | 67.58 | 70.76 | 64.41 | 66.53 | 0.3524 | 0.6858 | 0.7237 |
| 100% | 67.58 | 69.07 | 66.10 | 67.08 | 0.3519 | 0.6806 | 0.7350 |
| 200% | 69.28 | 72.03 | 66.53 | 68.27 | 0.3862 | 0.7010 | 0.7395 |
| 300% | 65.47 | 68.64 | 62.29 | 66.82 | 0.3143 | 0.6447 | 0.7265 |
| rbfSVM | original | 69.07 | 68.64 | 69.49 | 69.23 | 0.3814 | 0.6894 | 0.7374 |
| 100% | 68.86 | 67.37 | 70.34 | 69.43 | 0.3773 | 0.6839 | 0.7160 |
| 200% | 68.43 | 69.49 | 67.37 | 68.05 | 0.3687 | 0.6876 | 0.7195 |
| 300% | 66.95 | 68.64 | 65.25 | 67.84 | 0.3435 | 0.6652 | 0.6964 |

Supplementary Table 4 Description of each peptide database

| **Database** | **The total number of peptides** | **The number of peptides after processing** | **Overlapping peptide with BioDADpep** | **Frequency** |
| --- | --- | --- | --- | --- |
| AVPdb | 2059 | 2025 | 0 | 0 |
| BioPepDB | 4807 | 3717 | 19 | 0.51% |
| CAMPr3 | 8225 | 3985 | 0 | 0 |
| CancerPPD | 3142 | 2656 | 0 | 0 |
| CPPsite | 1564 | 1494 | 0 | 0 |
| DRAMP | 28023 | 23433 | 0 | 0 |
| HIPdb | 981 | 950 | 0 | 0 |
| SATPdb | 16590 | 15232 | 20 | 0.13% |
| THPdb | 894 | 78 | 0 | 0 |
| UniProt | 4164 | 4122 | 0 | 0 |
| Average | | | | 0.068% |
